# Supplementary material
Source: HighWire-hosted journal article supplement (https://erj.ersjournals.com/content/54/2/1801073)
Supplement: inline-supplementary-material-1 [file inline-supplementary-material-1.pdf]

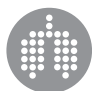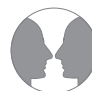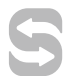

SHAREABLE PDF

# High nicotine exposure in rodents is unlikely to inform about its toxicity in humans

Rosalia Emma <sup>1</sup>, Riccardo Polosa<sup>1,2</sup> and Massimo Caruso <sup>1</sup>

**Affiliations:** <sup>1</sup>Dept of Clinical and Experimental Medicine, University of Catania, Catania, Italy. <sup>2</sup>Center of Excellence for the acceleration of HArm Reduction (CoEHAR), University of Catania, Catania, Italy.

**Correspondence:** Massimo Caruso, University of Catania, Dept of Clinical and Experimental Medicine, Hospital University, Via S. Sofia, 78, Catania, CT 95125, Italy. E-mail: mascaru@unict.it

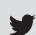

@ERSpublications

More realistic exposures protocols are required to provide reliable toxicological information about electronic cigarette use in the context of smoking harm reduction <http://bit.ly/2YkZHWG>

**Cite this article as:** Emma R, Polosa R, Caruso M. High nicotine exposure in rodents is unlikely to inform about its toxicity in humans. *Eur Respir J* 2019; 54: 1801073 [<https://doi.org/10.1183/13993003.01073-2018>].

This single-page version can be shared freely online.

## *To the Editor:*

We read with interest the research letter by REINIKOVAITE *et al.* [1], in which the authors reported same level of damage in the lungs of Sprague Dawley rats subjected to whole body chronic exposure of e-cigarette vapour emissions and cigarette smoke, as well as to subcutaneous injection of nicotine. Their conclusion is that e-cigarette use and long-time consumption of nicotine are just as toxic as tobacco cigarettes. We appreciate the authors' intention to address concerns related to the potential long-term health effects of e-cigarette use and nicotine exposure, but there are a number of methodological considerations that lessen the impact of their findings.
